# Supplementary material for: Proteome-wide analysis of Coxiella burnetii for conserved T-cell epitopes with presentation across multiple host species
Source: BMC Bioinformatics. 2021 Jun 2;22:296. doi: 10.1186/s12859-021-04181-w (PMC8170629; doi:10.1186/s12859-021-04181-w)
Supplement: Supplementary file 9 — Additional file 9. Condensed MHCI epitopes. Manually annotated high binding MHCI epitopes that are present in all three species, human, murine, and bovine. Pos indicates the peptide of interest start site within the NCBI cited protein (GenBank ID, gene name, or locus tag). Location was derived through use of the program Inmembrane, wherein PSE defines a potentially surface exposed protein. [file 12859_2021_4181_MOESM9_ESM.xlsx]

## Sheet: MHCI Epitopes Cross-Species
Proteome-wide Analysis of Coxiella burnetii for Conserved T-cell epitopes with Presentation Across Multiple Host Species
Lindsay M.W. Piel1, Codie J. Durfee1, Stephen N. White1,2,3
1 USDA-ARS Animal Disease Research Unit, Pullman, WA 99164, USA
2 Department of Veterinary Microbiology & Pathology, Washington State University, Pullman, WA 99164, USA
3 Center for Reproductive Biology, Washington State University, Pullman, WA 99164, USA
Correspondence: Stephen.White@usda.gov
Pos	GenBankID	Peptide	Gene Name	Locus Tag	Location
230	AAO89571.1	SQEEFFHTF	dnaA	CBU_0001	CYTOPLASM(non-PSE)
339	AAO89573.2	RLPPHSTLF	recF	CBU_0003	CYTOPLASM(non-PSE)
152	AAO89579.1	VPYPPGWML	dacB	CBU_0009	SECRETED
158	AAO89580.1	HALAKIFHL	aroE	CBU_0010	CYTOPLASM(non-PSE)
188	AAO89585.2	LQIELRQSL		CBU_0015	CYTOPLASM(non-PSE)
6	AAO89590.2	MQVPLQITL		CBU_0020	CYTOPLASM(non-PSE)
148	AAO89590.2	VVHPTFEKL		CBU_0020	CYTOPLASM(non-PSE)
390	AAO89591.1	RLLEPIFVL		CBU_0021	CYTOPLASM(non-PSE)
43	AAO89592.1	SLKEVEITL		CBU_0022	CYTOPLASM(non-PSE)
128	AAO89592.1	VAHSAFNTL		CBU_0022	CYTOPLASM(non-PSE)
73	AAO89610.1	YLKKHLESL		CBU_0041	CYTOPLASM(non-PSE)
454	AAO89610.1	FSFAKTQAL		CBU_0041	CYTOPLASM(non-PSE)
460	AAO89610.1	QALPHLWEL		CBU_0041	CYTOPLASM(non-PSE)
524	AAO89610.1	KVADTHIAF		CBU_0041	CYTOPLASM(non-PSE)
93	AAO89613.2	VTMPTLTRL		CBU_0044	CYTOPLASM(non-PSE)
27	AAO89614.1	KPAPPPPPF		CBU_0045	PSE-Lipoprotein
312	AAO89616.1	YTLDEILLL		CBU_0049	PSE-Membrane
5	AAO89617.1	FADHPFVKF		CBU_0050	CYTOPLASM(non-PSE)
133	AAO89621.1	ITADHPYYF		CBU_0054	CYTOPLASM(non-PSE)
292	AAO89623.1	QQRGFPPSL		CBU_0056	SECRETED
469	AAO89623.1	KVFTPSTTL		CBU_0056	SECRETED
21	AAO89630.2	YAASPFVLL	kdtA	CBU_0063	PSE-Membrane
74	AAO89630.2	AAVPLIKAL	kdtA	CBU_0063	PSE-Membrane
10	ACI15234.1	RASPWVIAL		CBU_0065a	MEMBRANE(non-PSE)
198	AAO89644.1	AAFEVLTLL		CBU_0077	MEMBRANE(non-PSE)
215	AAO89644.1	MQMPLKLFL		CBU_0077	MEMBRANE(non-PSE)
43	AAO89659.1	YAFYGGQSL	queE	CBU_0093	CYTOPLASM(non-PSE)
299	AAO89662.1	RIFEYLPSM	clS	CBU_0096	CYTOPLASM(non-PSE)
65	AAO89663.1	AQSEFGVQL	pssA	CBU_0097	MEMBRANE(non-PSE)
209	AAO89663.1	IAFDPPDILL	pssA	CBU_0097	MEMBRANE(non-PSE)
427	AAO89669.1	KMFPKAQFM		CBU_0103	CYTOPLASM(non-PSE)
348	AAO89682.2	AAAKILLSL	ftsI	CBU_0118	PSE-Membrane
175	AAO89683.2	VAHPNNPQL		CBU_0119	PSE-Membrane
30	AAO89688.1	RTIQPGSLF	murF	CBU_0124	CYTOPLASM(non-PSE)
321	AAO89689.1	RMAPLHHHF	mraY	CBU_0125	MEMBRANE(non-PSE)
163	AAO89695.1	FQLETTFSL	murD	CBU_0131	CYTOPLASM(non-PSE)
40	AAO89696.1	RQFGYPFHYF	ftsW	CBU_0132	MEMBRANE(non-PSE)
136	AAO89696.1	YQSEVQKEL	ftsW	CBU_0132	MEMBRANE(non-PSE)
225	AAO89696.1	HQFGSGYQL	ftsW	CBU_0132	MEMBRANE(non-PSE)
19	AAO89702.1	KLIPTVLAL	ftsQ	CBU_0138	PSE-Membrane
348	AAO89704.2	FQMPVRLGL	ftsA	CBU_0140	CYTOPLASM(non-PSE)
350	AAO89705.3	HQLDRPTYM	ftsZ	CBU_0141	CYTOPLASM(non-PSE)
319	AAO89711.2	YAALRAHTL	secA	CBU_0147	CYTOPLASM(non-PSE)
697	AAO89711.2	SSFVPPQSL	secA	CBU_0147	CYTOPLASM(non-PSE)
33	AAO89719.1	AQSPLLHYL	pilB	CBU_0155	CYTOPLASM(non-PSE)
258	AAO89719.1	RLLNPVHHL	pilB	CBU_0155	CYTOPLASM(non-PSE)
27	AAO89720.1	IAIPSYHTY	pilA	CBU_0156	PSE-Membrane
96	AAO89722.1	TVYRKQPTM		CBU_0158	CYTOPLASM(non-PSE)
87	AAO89725.1	VTIGPFTSF		CBU_0165	PSE-Membrane
60	AAO89737.2	SIFQTIPSL		CBU_0177	PSE-Membrane
487	AAO89737.2	KTMQHLNAL		CBU_0177	PSE-Membrane
132	AAO89740.2	FQIKPPHQL		CBU_0180	PSE-Cellwall
167	AAO89740.2	DQKPITTAL		CBU_0180	PSE-Cellwall
74	AAO89743.2	QLIEAIPEL		CBU_0183	CYTOPLASM(non-PSE)
8	AAO89753.2	KIQEKSHSF		CBU_0193	CYTOPLASM(non-PSE)
98	AAO89754.1	NQYPLNFSL	sda	CBU_0194	CYTOPLASM(non-PSE)
128	AAO89754.1	RAYDKNAAL	sda	CBU_0194	CYTOPLASM(non-PSE)
96	AAO89757.1	HADNIKIVL		CBU_0197	PSE-Membrane
147	AAO89757.1	NQIEFNHAL		CBU_0197	PSE-Membrane
165	AAO89757.1	QPYPVNVYL		CBU_0197	PSE-Membrane
375	AAO89757.1	HVHTPVHRL		CBU_0197	PSE-Membrane
637	AAO89757.1	RAILKPTTF		CBU_0197	PSE-Membrane
755	AAO89757.1	KTSPIVPQL		CBU_0197	PSE-Membrane
210	AAO89758.1	SATPFHESF		CBU_0198	PSE-Membrane
22	AAO89760.2	TQATFVPTL		CBU_0200	CYTOPLASM(non-PSE)
207	AAO89760.2	ALFPLPISV		CBU_0200	CYTOPLASM(non-PSE)
112	AAO89768.1	TVIERALYL		CBU_0209	CYTOPLASM(non-PSE)
44	AAO89773.1	YIFSHSYLF		CBU_0214	MEMBRANE(non-PSE)
108	AAO89773.1	YAYTKQNVF		CBU_0214	MEMBRANE(non-PSE)
38	AAO89774.2	RIYRPLFSL		CBU_0215	PSE-Cellwall
60	AAO89774.2	AADDSTISL		CBU_0215	PSE-Cellwall
355	AAO89774.2	HMATVITTL		CBU_0215	PSE-Cellwall
421	AAO89774.2	YLIEKGHHL		CBU_0215	PSE-Cellwall
488	AAO89774.2	LQYPEDPSL		CBU_0215	PSE-Cellwall
509	AAO89774.2	YLDELPNYL		CBU_0215	PSE-Cellwall
154	AAO89777.1	MQKPTATTF	cydA-1	CBU_0218	PSE-Membrane
289	AAO89777.1	ISIPYALSL	cydA-1	CBU_0218	PSE-Membrane
455	AAO89777.1	SVHEILPTF	cydA-1	CBU_0218	PSE-Membrane
130	AAO89823.1	SANPLITLL		CBU_0265	MEMBRANE(non-PSE)
180	AAO89830.1	VVPTPPQTL		CBU_0272	PSE-Membrane
16	AAO89831.1	RLYGRVQRL		CBU_0273	CYTOPLASM(non-PSE)
85	AAO89834.2	GSYPIAPSL		CBU_0276	CYTOPLASM(non-PSE)
242	AAO89834.2	TSIENIYAL		CBU_0276	CYTOPLASM(non-PSE)
302	AAO89834.2	VTYPPPKTL		CBU_0276	CYTOPLASM(non-PSE)
107	AAO89837.1	LQMPKSIYF		CBU_0279	CYTOPLASM(non-PSE)
317	AAO89844.1	FLWPPVQEL	pcnB	CBU_0286	CYTOPLASM(non-PSE)
158	AAO89845.1	RIIKNPSSL	folK-2	CBU_0287	CYTOPLASM(non-PSE)
303	AAO89860.1	YQSLHTTLF	spoT	CBU_0303	CYTOPLASM(non-PSE)
213	AAO89864.1	FVAPVTHLF		CBU_0307	SECRETED
101	AAO89868.2	YQYDNVRSV		CBU_0311	PSE-Membrane
59	AAO89870.2	AVISHRFSF		CBU_0313	PSE-Cellwall
12	AAO89872.1	YQQPPGSWLL		CBU_0315	CYTOPLASM(non-PSE)
236	AAO89877.1	VASPIRQTL	icmH	CBU_0321	PSE-Membrane
143	AAO89886.2	IPNPITPEF	thiC	CBU_0330	CYTOPLASM(non-PSE)
333	AAO89886.2	RAYDVSFSL	thiC	CBU_0330	CYTOPLASM(non-PSE)
273	AAO89887.2	AVYSVHPAF		CBU_0331	CYTOPLASM(non-PSE)
285	AAO89887.2	RIIETVTAL		CBU_0331	CYTOPLASM(non-PSE)
18	AAO89889.1	AQYPSPQLM	thiG	CBU_0333	CYTOPLASM(non-PSE)
104	AAO89889.1	TLQPNPFEL	thiG	CBU_0333	CYTOPLASM(non-PSE)
34	AAO89890.1	HAASIITTI	thiDE	CBU_0334	CYTOPLASM(non-PSE)
71	AAO89890.1	TLPPTVIKL	thiDE	CBU_0334	CYTOPLASM(non-PSE)
216	AAO89890.1	SAISSAIAL	thiDE	CBU_0334	CYTOPLASM(non-PSE)
165	AAO89891.1	YMKPNDYRL		CBU_0335	CYTOPLASM(non-PSE)
28	AAO89893.1	FASSVQQSL	fis	CBU_0337	CYTOPLASM(non-PSE)
26	AAO89894.2	NQKPRTVYL	pepN	CBU_0338	CYTOPLASM(non-PSE)
483	AAO89894.2	NANDKTLTL	pepN	CBU_0338	CYTOPLASM(non-PSE)
534	AAO89894.2	KAIPGTRVL	pepN	CBU_0338	CYTOPLASM(non-PSE)
5	AAO89899.1	RQKEIISVL		CBU_0343	CYTOPLASM(non-PSE)
32	AAO89899.1	YASELRHLL		CBU_0343	CYTOPLASM(non-PSE)
148	AAO89904.1	KPHPEPLLF	gph	CBU_0349	CYTOPLASM(non-PSE)
115	AAO89907.1	SVHSVPVML	czcD.1	CBU_0352	MEMBRANE(non-PSE)
201	AAO89908.1	AQLPNFHRYL		CBU_0353	PSE-Membrane
280	AAO89917.1	AVYDATITL		CBU_0362	CYTOPLASM(non-PSE)
7	AAO89918.2	VQNPTLESL		CBU_0364	MEMBRANE(non-PSE)
174	AAO89918.2	MAFHLPHAL		CBU_0364	MEMBRANE(non-PSE)
234	AAO89918.2	AVATPVQKL		CBU_0364	MEMBRANE(non-PSE)
277	AAO89918.2	KAISPHASL		CBU_0364	MEMBRANE(non-PSE)
282	AAO89918.2	HASLLKHTL		CBU_0364	MEMBRANE(non-PSE)
146	AAO89926.1	TAFPKRVEV		CBU_0372	PSE-Membrane
291	AAO89926.1	VANDIINFL		CBU_0372	PSE-Membrane
50	AAO89927.1	NMNPHPLHI		CBU_0373	CYTOPLASM(non-PSE)
64	AAO89927.1	KQTEFGQTL		CBU_0373	CYTOPLASM(non-PSE)
77	AAO89932.1	SAWQGRIHL	ampD	CBU_0379	PSE-Cellwall
114	AAO89932.1	YQIELIIEL	ampD	CBU_0379	PSE-Cellwall
299	AAO89935.1	KQAEKAHTYL	ispB	CBU_0382	CYTOPLASM(non-PSE)
422	AAO89941.1	DSYPIIQSL		CBU_0388	CYTOPLASM(non-PSE)
489	AAO89941.1	MAFEILEQL		CBU_0388	CYTOPLASM(non-PSE)
1010	AAO89941.1	SIIERVKAL		CBU_0388	CYTOPLASM(non-PSE)
1249	AAO89941.1	VAAPLFMTL		CBU_0388	CYTOPLASM(non-PSE)
1265	AAO89941.1	RMFAKVFSL		CBU_0388	CYTOPLASM(non-PSE)
1271	AAO89941.1	FSLPIEVEL		CBU_0388	CYTOPLASM(non-PSE)
49	AAO89942.1	SAYQHAVQI	rpsT	CBU_0389	CYTOPLASM(non-PSE)
475	AAO89943.1	SVMERVWHL	mviN	CBU_0390	MEMBRANE(non-PSE)
30	AAO89950.2	YLANHFLSL	lspA	CBU_0397	MEMBRANE(non-PSE)
119	AAO89970.1	KQADIYPTL		CBU_0418	CYTOPLASM(non-PSE)
53	AAO89975.1	SLFINPTQF	panC	CBU_0423	CYTOPLASM(non-PSE)
50	AAO89976.1	VMYGHSTTL	panB	CBU_0424	CYTOPLASM(non-PSE)
10	AAO89977.1	VVDSKPHEL		CBU_0425	CYTOPLASM(non-PSE)
14	AAO89977.1	KPHELTLLF		CBU_0425	CYTOPLASM(non-PSE)
38	AAO89977.1	SQIENLHKIL		CBU_0425	CYTOPLASM(non-PSE)
198	AAO89977.1	TVYDTTITL		CBU_0425	CYTOPLASM(non-PSE)
26	AAO89978.2	TASPKAVAL		CBU_0426	MEMBRANE(non-PSE)
211	AAO89978.2	VAMPPIEVL		CBU_0426	MEMBRANE(non-PSE)
112	AAO89984.1	SVFSGFLIL		CBU_0433	MEMBRANE(non-PSE)
32	AAO89987.1	RLDSKVQSL		CBU_0436	MEMBRANE(non-PSE)
24	AAO90001.2	LVFPGRQVL		CBU_0451	MEMBRANE(non-PSE)
37	AAO90001.2	SSYALVHVL		CBU_0451	MEMBRANE(non-PSE)
117	AAO90002.1	ALYPQRVAF	corB	CBU_0452	PSE-Membrane
123	AAO90002.1	VAFPASLPL	corB	CBU_0452	PSE-Membrane
3	AAO90003.2	FQMDRGMTF	fimT	CBU_0453	PSE-Membrane
110	AAO90010.1	HVYERVFAL	ampE	CBU_0460	MEMBRANE(non-PSE)
172	AAO90011.1	SSYPHPFLM	pdhA	CBU_0461	CYTOPLASM(non-PSE)
637	AAO90011.1	HQDSHNLLM	pdhA	CBU_0461	CYTOPLASM(non-PSE)
225	AAO90025.1	AAFLGVHPL		CBU_0476	CYTOPLASM(non-PSE)
237	AAO90025.1	EMYSVPQAL		CBU_0476	CYTOPLASM(non-PSE)
536	AAO90025.1	KMADIKRTL		CBU_0476	CYTOPLASM(non-PSE)
26	AAO90029.1	KQDELVTKL	argR	CBU_0480	CYTOPLASM(non-PSE)
144	AAO90029.1	ALIEVKASL	argR	CBU_0480	CYTOPLASM(non-PSE)
49	AAO90031.1	ATYPPYVYM		CBU_0482	SECRETED
204	AAO90032.1	SVSQLVLKL	artQ	CBU_0483	MEMBRANE(non-PSE)
58	AAO90036.1	KVIETLIHL		CBU_0488	CYTOPLASM(non-PSE)
63	AAO90037.1	HATPPPPSF		CBU_0489	SECRETED
348	AAO90038.2	GQLPKLITL		CBU_0490	CYTOPLASM(non-PSE)
320	AAO90040.1	QVDKNIPQL	plsX	CBU_0492	CYTOPLASM(non-PSE)
278	AAO90041.1	SAASIPLAL	fabH	CBU_0493	CYTOPLASM(non-PSE)
165	AAO90048.1	SANEPTVQW	holB	CBU_0500	CYTOPLASM(non-PSE)
192	AAO90048.1	ASYAPLQALQL	holB	CBU_0500	CYTOPLASM(non-PSE)
35	AAO90054.1	SPDELTHEL	recJ	CBU_0506	CYTOPLASM(non-PSE)
257	AAO90054.1	QAHPGILAL	recJ	CBU_0506	CYTOPLASM(non-PSE)
426	AAO90054.1	HAMAAGLSL	recJ	CBU_0506	CYTOPLASM(non-PSE)
397	AAO90061.2	SIHDFHQAF		CBU_0515	MEMBRANE(non-PSE)
39	AAO90063.2	QQLEPSVTL	aspB	CBU_0517	CYTOPLASM(non-PSE)
156	AAO90063.2	VSYPPMVQL	aspB	CBU_0517	CYTOPLASM(non-PSE)
222	AAO90063.2	VLMEHPQIL	aspB	CBU_0517	CYTOPLASM(non-PSE)
242	AAO90064.1	TVYPKTHYV	uvrB	CBU_0518	CYTOPLASM(non-PSE)
272	AAO90064.1	SQLEKANKL	uvrB	CBU_0518	CYTOPLASM(non-PSE)
116	AAO90065.1	RLIPVVRTF		CBU_0519	MEMBRANE(non-PSE)
81	AAO90067.2	YTADQHLEL		CBU_0521	CYTOPLASM(non-PSE)
481	AAO90070.2	AIIDKIEEL	gyrA	CBU_0524	CYTOPLASM(non-PSE)
413	AAO90072.1	TSFPNFVEL	aroA	CBU_0526	CYTOPLASM(non-PSE)
24	AAO90073.1	IAFRIAQTL	cmk	CBU_0527	CYTOPLASM(non-PSE)
55	AAO90076.2	KAVDVFIKL		CBU_0530	CYTOPLASM(non-PSE)
161	AAO90076.2	KAIETAQKL		CBU_0530	CYTOPLASM(non-PSE)
308	AAO90076.2	QQIQRQPSL		CBU_0530	CYTOPLASM(non-PSE)
170	AAO90077.1	KQFDRNFLL	pyrF	CBU_0531	CYTOPLASM(non-PSE)
226	AAO90080.1	SQYSPLRGL		CBU_0534	PSE-Membrane
356	AAO90080.1	RMDDLLHTF		CBU_0534	PSE-Membrane
40	AAO90091.2	YAISIYNHL	lemA	CBU_0545	PSE-Membrane
185	AAO90091.2	SAFPSKLNF	lemA	CBU_0545	PSE-Membrane
89	AAO90092.1	FTFNHKLML	htpX	CBU_0546	MEMBRANE(non-PSE)
296	AAO90092.1	YAQTPHESL	htpX	CBU_0546	MEMBRANE(non-PSE)
91	AAO90093.1	IAYDQAIQL		CBU_0547	CYTOPLASM(non-PSE)
125	AAO90093.1	KAYQKAIAL		CBU_0547	CYTOPLASM(non-PSE)
383	AAO90093.1	LQYQVPQKL		CBU_0547	CYTOPLASM(non-PSE)
550	AAO90093.1	KAIEGYLVL		CBU_0547	CYTOPLASM(non-PSE)
317	AAO90094.1	TVYQLSQAL		CBU_0548	CYTOPLASM(non-PSE)
151	AAO90095.2	KIKPLIISL	rodA	CBU_0549	MEMBRANE(non-PSE)
220	AAO90095.2	YQKERVLTF	rodA	CBU_0549	MEMBRANE(non-PSE)
403	AAO90096.2	RMDDILQRF	pbpA	CBU_0550	PSE-Membrane
29	AAO90101.2	LANELIQKL	nadD	CBU_0556	CYTOPLASM(non-PSE)
34	AAO90103.1	SPNDIPPQL		CBU_0558	PSE-Lipoprotein
300	AAO90108.1	KVFNGLMVL	cutE	CBU_0564	PSE-Membrane
199	AAO90110.1	HTWGRVLEL		CBU_0566	MEMBRANE(non-PSE)
10	AAO90111.1	TQFEDLPSL		CBU_0567	CYTOPLASM(non-PSE)
60	AAO90112.1	KAAEVLKSL		CBU_0568	CYTOPLASM(non-PSE)
113	AAO90114.1	YAANYWPTL		CBU_0570	MEMBRANE(non-PSE)
68	AAO90122.1	QLYQTIPEL		CBU_0578	MEMBRANE(non-PSE)
78	AAO90123.1	HAVDWPVYF		CBU_0579	PSE-Membrane
254	AAO90123.1	FLYENISLL		CBU_0579	PSE-Membrane
413	AAO90123.1	YAHPQAIAYF		CBU_0579	PSE-Membrane
100	AAO90130.1	FAFKKFYVL		CBU_0586	CYTOPLASM(non-PSE)
739	AAO90130.1	YVYEHKGTF		CBU_0586	CYTOPLASM(non-PSE)
968	AAO90130.1	MAAAHLRSL		CBU_0586	CYTOPLASM(non-PSE)
1	AAO90131.1	MMYKQISHL	glpE	CBU_0587	CYTOPLASM(non-PSE)
141	AAO90132.1	NAVEIIHHL	nadA	CBU_0588	CYTOPLASM(non-PSE)
199	AAO90132.1	KQYPHAAVL	nadA	CBU_0588	CYTOPLASM(non-PSE)
283	AAO90132.1	MAMNNLQSL	nadA	CBU_0588	CYTOPLASM(non-PSE)
35	AAO90136.2	NQNQVVYSL		CBU_0592	MEMBRANE(non-PSE)
258	AAO90143.1	AQKEKVFEL	cysQ-1	CBU_0599	CYTOPLASM(non-PSE)
28	AAO90152.1	AAIDKFISI		CBU_0608	CYTOPLASM(non-PSE)
148	AAO90152.1	SIYGGVLAF		CBU_0608	CYTOPLASM(non-PSE)
470	AAO90155.1	SQYQQNYSF	yaeT	CBU_0611	PSE-Membrane
551	AAO90155.1	IAAPSVLAF	yaeT	CBU_0611	PSE-Membrane
795	AAO90155.1	FQFSFGVSL	yaeT	CBU_0611	PSE-Membrane
148	AAO90159.1	GAFSGVHQF	lpxA	CBU_0615	CYTOPLASM(non-PSE)
249	AAO90164.1	IQNDISYVL	lpxB	CBU_0620	CYTOPLASM(non-PSE)
264	AAO90164.1	VAASGTVTL	lpxB	CBU_0620	CYTOPLASM(non-PSE)
329	AAO90164.1	IADEVFQLL	lpxB	CBU_0620	CYTOPLASM(non-PSE)
22	AAO90165.1	YSALPQSEL		CBU_0621	CYTOPLASM(non-PSE)
92	AAO90170.1	FAAKIGQEL		CBU_0626	CYTOPLASM(non-PSE)
618	AAO90170.1	SAISNLEQL		CBU_0626	CYTOPLASM(non-PSE)
114	AAO90172.1	RAYEAIQSL	ppa	CBU_0628	CYTOPLASM(non-PSE)
121	AAO90172.1	SLKDISSLL	ppa	CBU_0628	CYTOPLASM(non-PSE)
14	AAO90173.1	AQNAIRPSL	putA	CBU_0629	CYTOPLASM(non-PSE)
272	AAO90173.1	FLIERVKEL	putA	CBU_0629	CYTOPLASM(non-PSE)
219	AAO90187.1	YILDTHLRL	ribD	CBU_0643	CYTOPLASM(non-PSE)
160	AAO90190.2	SVMLIPHTL	ribE	CBU_0646	CYTOPLASM(non-PSE)
98	AAO90202.1	KTIELLQSM		CBU_0658	CYTOPLASM(non-PSE)
195	AAO90209.1	SSKQHIVEL		CBU_0665	CYTOPLASM(non-PSE)
73	AAO90211.1	KTFDAGYTF	dapD	CBU_0667	CYTOPLASM(non-PSE)
114	AAO90211.1	YLAPNTVLM	dapD	CBU_0667	CYTOPLASM(non-PSE)
450	AAO90216.1	TAHDLHQYL		CBU_0672	CYTOPLASM(non-PSE)
465	AAO90216.1	LVYRGHHSL		CBU_0672	CYTOPLASM(non-PSE)
137	AAO90222.1	KAYGGKMLF		CBU_0678	CYTOPLASM(non-PSE)
244	AAO90222.1	RAAGAQVTF		CBU_0678	CYTOPLASM(non-PSE)
253	AAO90223.1	RPIEKTTTL		CBU_0679	CYTOPLASM(non-PSE)
262	AAO90223.1	IQSDPTWEL		CBU_0679	CYTOPLASM(non-PSE)
320	AAO90224.1	HSIKNSPSM		CBU_0680	CYTOPLASM(non-PSE)
233	AAO90225.1	QLAEKVVQL		CBU_0681	CYTOPLASM(non-PSE)
18	AAO90227.1	SQLPRQIVM		CBU_0683	CYTOPLASM(non-PSE)
739	AAO90229.1	VVSPVPPVL		CBU_0685	CYTOPLASM(non-PSE)
785	AAO90229.1	YAKPILHPM		CBU_0685	CYTOPLASM(non-PSE)
856	AAO90229.1	SAYPATDRLYF		CBU_0685	CYTOPLASM(non-PSE)
941	AAO90229.1	TAAEVQWRL		CBU_0685	CYTOPLASM(non-PSE)
334	AAO90231.1	YLIGITPSL		CBU_0687	PSE-Membrane
210	AAO90234.2	FSYSSPIYL		CBU_0690	CYTOPLASM(non-PSE)
31	AAO90239.1	YALDKVPQI		CBU_0695	CYTOPLASM(non-PSE)
358	AAO90240.2	YIIKKVREF		CBU_0696	CYTOPLASM(non-PSE)
202	AAO90241.1	MLNDRIHAL		CBU_0697	CYTOPLASM(non-PSE)
141	AAO90242.1	MLLPNQPSL		CBU_0698	CYTOPLASM(non-PSE)
23	AAO90245.2	FAAKKILSI	cysQ-2	CBU_0701	CYTOPLASM(non-PSE)
30	AAO90245.2	SIYSEPTSL	cysQ-2	CBU_0701	CYTOPLASM(non-PSE)
257	AAO90245.2	FLNPKFLAL	cysQ-2	CBU_0701	CYTOPLASM(non-PSE)
142	AAO90256.2	LVTPLSHTL		CBU_0713	MEMBRANE(non-PSE)
206	AAO90256.2	QQVPHPQHYL		CBU_0713	MEMBRANE(non-PSE)
8	AAO90257.2	EAMPFDLSL		CBU_0714	CYTOPLASM(non-PSE)
290	AAO90259.1	AAFAVDHEL		CBU_0716	CYTOPLASM(non-PSE)
30	AAO90260.1	SIIHKLTSF		CBU_0718	PSE-Membrane
79	AAO90261.1	SAIPDVFSI		CBU_0719	MEMBRANE(non-PSE)
151	AAO90263.2	TIYEIANSL		CBU_0721	CYTOPLASM(non-PSE)
172	AAO90264.2	AAYQLGVTF		CBU_0722	CYTOPLASM(non-PSE)
376	AAO90264.2	VSDEPLMTM		CBU_0722	CYTOPLASM(non-PSE)
169	AAO90267.1	YQALPIVAL		CBU_0727	MEMBRANE(non-PSE)
259	AAO90267.1	LVLPKIIAL		CBU_0727	MEMBRANE(non-PSE)
261	AAO90269.1	QILPTVQQL		CBU_0729	PSE-Membrane
137	AAO90275.1	ISYPALASL		CBU_0735	CYTOPLASM(non-PSE)
173	AAO90276.1	FSYYPSSTF		CBU_0736	SECRETED
185	AAO90277.1	SAKDFQLEL	tig	CBU_0737	CYTOPLASM(non-PSE)
81	AAO90281.1	RAFEKASAM	pmbA	CBU_0741	CYTOPLASM(non-PSE)
191	AAO90281.1	MQRDHDYTL	pmbA	CBU_0741	CYTOPLASM(non-PSE)
29	AAO90283.1	YQSETWVRF	ptsH	CBU_0743	CYTOPLASM(non-PSE)
46	AAO90284.1	ALIDRGHQL		CBU_0744	CYTOPLASM(non-PSE)
81	AAO90287.2	AQAETILYF		CBU_0747	CYTOPLASM(non-PSE)
71	AAO90288.1	FPYQNSFQF		CBU_0748	PSE-Lipoprotein
77	AAO90288.1	FQFTRPHYL		CBU_0748	PSE-Lipoprotein
292	AAO90290.1	MQQNKITSL		CBU_0750	CYTOPLASM(non-PSE)
266	AAO90293.1	SADQSIVTL		CBU_0753	PSE-Membrane
454	AAO90293.1	QAANIFRSF		CBU_0753	PSE-Membrane
603	AAO90293.1	KAFDSVFAM		CBU_0753	PSE-Membrane
786	AAO90293.1	VVLPHYNHL		CBU_0753	PSE-Membrane
1000	AAO90293.1	YAYKFKLFL		CBU_0753	PSE-Membrane
135	AAO90294.1	TVYSDKVSL		CBU_0754	SECRETED
198	AAO90294.1	VVYDLPNHF		CBU_0754	SECRETED
183	AAO90296.2	YQDKIHFYF		CBU_0756	CYTOPLASM(non-PSE)
11	AAO90307.1	VANEHPLQI	prpB	CBU_0771	CYTOPLASM(non-PSE)
224	AAO90312.1	RAMPDQAQF		CBU_0776	CYTOPLASM(non-PSE)
72	AAO90313.2	IASPFVLVL		CBU_0777	MEMBRANE(non-PSE)
236	AAO90313.2	YAAEAWRTL		CBU_0777	MEMBRANE(non-PSE)
358	AAO90317.1	SAVPPIPTW		CBU_0782	MEMBRANE(non-PSE)
440	AAO90317.1	AAIESGLTL		CBU_0782	MEMBRANE(non-PSE)
142	AAO90321.2	RLYQEPAYL		CBU_0787	CYTOPLASM(non-PSE)
231	AAO90321.2	QLIENKVTF		CBU_0787	CYTOPLASM(non-PSE)
476	AAO90321.2	FMIPQHYYL		CBU_0787	CYTOPLASM(non-PSE)
58	AAO90323.2	AANDFAIKL		CBU_0789	CYTOPLASM(non-PSE)
482	AAO90323.2	TIFEHFSRL		CBU_0789	CYTOPLASM(non-PSE)
817	AAO90323.2	KAIEAFLKM		CBU_0789	CYTOPLASM(non-PSE)
309	AAO90328.1	STVSNHPSL		CBU_0794	CYTOPLASM(non-PSE)
220	AAO90332.1	SAYQPLFAL		CBU_0798	PSE-Membrane
228	AAO90337.1	KTFYGTVSF		CBU_0803	PSE-Membrane
122	AAO90338.1	NANPPTITV		CBU_0804	PSE-Membrane
295	AAO90338.1	VAHEVKQAL		CBU_0804	PSE-Membrane
738	AAO90338.1	KSYEVIVQM		CBU_0804	PSE-Membrane
97	AAO90341.1	YPYLKPLTL		CBU_0807	CYTOPLASM(non-PSE)
343	AAO90341.1	HVMERNITF		CBU_0807	CYTOPLASM(non-PSE)
29	AAO90343.2	MTNQFVHYL		CBU_0809	PSE-Membrane
325	AAO90344.1	MVYQIPPIF		CBU_0810	PSE-Membrane
195	AAO90346.1	YAFAIQAYL		CBU_0812	MEMBRANE(non-PSE)
75	AAO90351.2	YSFDHWIAF	aacA4	CBU_0817	CYTOPLASM(non-PSE)
253	AAO90358.1	RLSEFLQSL	purB	CBU_0824	CYTOPLASM(non-PSE)
400	AAO90358.1	RAYEQLKEL	purB	CBU_0824	CYTOPLASM(non-PSE)
332	AAO90359.1	AASQQVLSL		CBU_0825	CYTOPLASM(non-PSE)
107	AAO90360.1	SVPPKVSLF	rfaH	CBU_0826	CYTOPLASM(non-PSE)
169	AAO90361.1	TAFEAPQQM		CBU_0827	CYTOPLASM(non-PSE)
145	AAO90362.1	YLYSNRLNL		CBU_0828	CYTOPLASM(non-PSE)
336	AAO90362.1	AVVDNHVAL		CBU_0828	CYTOPLASM(non-PSE)
361	AAO90364.1	MAIPLHNRM		CBU_0830	CYTOPLASM(non-PSE)
200	AAO90365.1	RIMPAGHFM	asnB-1	CBU_0831	CYTOPLASM(non-PSE)
277	AAO90365.1	KQLPHIRTF	asnB-1	CBU_0831	CYTOPLASM(non-PSE)
305	AAO90365.1	QAAEHLSYL	asnB-1	CBU_0831	CYTOPLASM(non-PSE)
217	AAO90368.1	KAWEDIKSL		CBU_0834	CYTOPLASM(non-PSE)
347	AAO90370.2	IPAEIPMQL		CBU_0836	CYTOPLASM(non-PSE)
120	AAO90371.1	YSFFGPVLL		CBU_0837	PSE-Membrane
294	AAO90371.1	SINPLQHFL		CBU_0837	PSE-Membrane
334	AAO90371.1	YSYPVNLLF		CBU_0837	PSE-Membrane
456	AAO90371.1	KQHSITHLL		CBU_0837	PSE-Membrane
90	AAO90372.2	KAYQPKLVLSF		CBU_0838	PSE-Membrane
188	AAO90372.2	YSFPAILAV		CBU_0838	PSE-Membrane
279	AAO90373.1	QQHDIPQLL		CBU_0839	CYTOPLASM(non-PSE)
200	AAO90374.1	SIYKGVYKL	asnB-2	CBU_0840	CYTOPLASM(non-PSE)
247	AAO90374.1	EVLEKTETL	asnB-2	CBU_0840	CYTOPLASM(non-PSE)
312	AAO90374.1	YAKEVAQHL	asnB-2	CBU_0840	CYTOPLASM(non-PSE)
460	AAO90374.1	SLWERPAEL	asnB-2	CBU_0840	CYTOPLASM(non-PSE)
31	AAO90377.2	NAYSKVVHF		CBU_0843	CYTOPLASM(non-PSE)
80	AAO90378.2	HLFDTVVHL		CBU_0844	CYTOPLASM(non-PSE)
90	AAO90378.2	AQAGVRYSL		CBU_0844	CYTOPLASM(non-PSE)
169	AAO90378.2	HSYAHLFQL		CBU_0844	CYTOPLASM(non-PSE)
333	AAO90379.1	KVIDIIEEL		CBU_0845	CYTOPLASM(non-PSE)
63	AAO90399.1	IAFLVTHHM		CBU_0866	MEMBRANE(non-PSE)
152	AAO90399.1	RSAEFVHHL		CBU_0866	MEMBRANE(non-PSE)
72	AAO90403.1	KIIRKIQQL		CBU_0870	CYTOPLASM(non-PSE)
184	AAO90406.1	VQIPHLEQL	aroC	CBU_0874	CYTOPLASM(non-PSE)
133	AAO90407.1	STIQLVVAL	asd	CBU_0875	CYTOPLASM(non-PSE)
188	AAO90407.1	SVFPLQIAF	asd	CBU_0875	CYTOPLASM(non-PSE)
267	AAO90407.1	SQAPGIIVI	asd	CBU_0875	CYTOPLASM(non-PSE)
81	AAO90418.1	SVYQYLQQM		CBU_0888	MEMBRANE(non-PSE)
118	AAO90419.2	ATIPRLLQF	dsbA	CBU_0889	CYTOPLASM(non-PSE)
25	AAO90421.1	NASTPVQSF		CBU_0891	PSE-Membrane
166	AAO90422.1	RMQEGLFSL	accD	CBU_0893	CYTOPLASM(non-PSE)
67	AAO90423.1	AAYTSPHLLQF	folC	CBU_0894	CYTOPLASM(non-PSE)
196	AAO90423.1	SVYEQVHLL	folC	CBU_0894	CYTOPLASM(non-PSE)
283	AAO90423.1	IQTPAPIVF	folC	CBU_0894	CYTOPLASM(non-PSE)
388	AAO90423.1	RPQDRIVVF	folC	CBU_0894	CYTOPLASM(non-PSE)
47	AAO90424.2	APDKPVVQL	dedD	CBU_0895	PSE-Membrane
132	AAO90424.2	YAKHLLQQL	dedD	CBU_0895	PSE-Membrane
209	AAO90433.1	LAYPMVYQL		CBU_0904	CYTOPLASM(non-PSE)
306	AAO90435.1	YVPNLTHEL		CBU_0906	MEMBRANE(non-PSE)
266	AAO90439.1	SMSQLPLAF		CBU_0910	CYTOPLASM(non-PSE)
13	AAO90440.2	STMDGFTVL		CBU_0911	CYTOPLASM(non-PSE)
443	AAO90441.1	AQAEKIQLL	prpD	CBU_0912	CYTOPLASM(non-PSE)
280	AAO90443.1	AVWKTVVTL		CBU_0914	MEMBRANE(non-PSE)
104	AAO90444.1	ALNQPFLQL	enhB.1	CBU_0915	SECRETED
65	AAO90445.1	HADLPQTEF		CBU_0916	CYTOPLASM(non-PSE)
317	AAO90449.1	VIYSPHQSL		CBU_0922	MEMBRANE(non-PSE)
164	AAO90450.1	SELPIILSL		CBU_0923	MEMBRANE(non-PSE)
317	AAO90458.2	SSYAGVRAL	glpD	CBU_0931	CYTOPLASM(non-PSE)
247	AAO90460.1	YLMEKGVGL		CBU_0933	MEMBRANE(non-PSE)
64	AAO90463.1	YQFNKYFAL		CBU_0936	SECRETED
396	AAO90481.1	YARPVGVTV		CBU_0959	MEMBRANE(non-PSE)
30	AAO90486.2	IQSEIIEQL		CBU_0964	CYTOPLASM(non-PSE)
74	AAO90486.2	SYDPKTQSF		CBU_0964	CYTOPLASM(non-PSE)
35	ACI15268.1	FSDPLSKHL		CBU_0964a	MEMBRANE(non-PSE)
182	AAO90487.1	AQAKFVHTI	cydA-2	CBU_0965	PSE-Membrane
304	AAO90487.1	QVLPGINEL	cydA-2	CBU_0965	PSE-Membrane
325	AAO90487.1	KAYSALTTL	cydA-2	CBU_0965	PSE-Membrane
309	AAO90492.1	LQHGGQHAL		CBU_0970	PSE-Membrane
128	AAO90494.1	YQVAHLPHL		CBU_0972	CYTOPLASM(non-PSE)
184	AAO90508.2	KAASPSHLF		CBU_0987	PSE-Lipoprotein
74	AAO90516.2	MAFPATLIL		CBU_0995	MEMBRANE(non-PSE)
265	AAO90522.1	IAMEKTIMF	lolC	CBU_1001	MEMBRANE(non-PSE)
274	AAO90523.1	YLLNKQIQL	birA	CBU_1002	CYTOPLASM(non-PSE)
34	AAO90529.1	KAYGSYIEL	bioA	CBU_1008	CYTOPLASM(non-PSE)
86	AAO90529.1	TTNEIIVAL	bioA	CBU_1008	CYTOPLASM(non-PSE)
311	AAO90529.1	KAFLHSHTY	bioA	CBU_1008	CYTOPLASM(non-PSE)
67	AAO90549.2	SLHEAYQAL		CBU_1031	CYTOPLASM(non-PSE)
259	AAO90556.1	SAKDPVRYF	cyoA	CBU_1040	PSE-Membrane
180	AAO90574.1	AQFGEQLAL	scpB	CBU_1060	CYTOPLASM(non-PSE)
197	AAO90577.1	ILYAHVHRL		CBU_1063	CYTOPLASM(non-PSE)
127	AAO90579.1	RLFLPHITL		CBU_1065	CYTOPLASM(non-PSE)
187	AAO90581.1	YAMEQQFPL	ttcA	CBU_1067	CYTOPLASM(non-PSE)
11	ACI15273.1	YSSEIPQNL		CBU_1067a	PSE-Membrane
64	ACI15273.1	IAAPLPIQL		CBU_1067a	PSE-Membrane
106	ACI15273.1	RQFQPLATL		CBU_1067a	PSE-Membrane
194	ACI15273.1	AQFTDPITF		CBU_1067a	PSE-Membrane
281	ACI15273.1	YLKEIVTVL		CBU_1067a	PSE-Membrane
536	ACI15273.1	FMRDGVLSL		CBU_1067a	PSE-Membrane
76	AAO90586.1	DQSPAYHTL		CBU_1073	SECRETED
30	AAO90587.1	LAIEISHAL		CBU_1074	CYTOPLASM(non-PSE)
13	AAO90591.1	SQDEKIYEI		CBU_1078	CYTOPLASM(non-PSE)
328	AAO90597.1	SQILKTHNL		CBU_1084	CYTOPLASM(non-PSE)
670	AAO90597.1	MQDDLIKVL		CBU_1084	CYTOPLASM(non-PSE)
370	AAO90598.2	YQQHIASAL		CBU_1085	CYTOPLASM(non-PSE)
56	AAO90600.1	FVKSPSYTL		CBU_1087	CYTOPLASM(non-PSE)
5	AAO90601.1	YQNRQIREL		CBU_1088	CYTOPLASM(non-PSE)
106	AAO90601.1	LPFPEPLLF		CBU_1088	CYTOPLASM(non-PSE)
126	AAO90606.1	SQLPVIQKL		CBU_1093	MEMBRANE(non-PSE)
747	AAO90606.1	KVIPQLSRL		CBU_1093	MEMBRANE(non-PSE)
156	AAO90610.1	KQQKPYPTL	aldC	CBU_1097	SECRETED
315	AAO90629.1	ATLPYVIAL	ald	CBU_1116	CYTOPLASM(non-PSE)
95	AAO90640.2	HVADPPLRL		CBU_1127	MEMBRANE(non-PSE)
3	AAO90641.1	YSKEVLHYF	iscU.1	CBU_1128	CYTOPLASM(non-PSE)
166	AAO90644.1	HQNTPIQQL		CBU_1131	CYTOPLASM(non-PSE)
1	AAO90647.1	MTVEHFVAF		CBU_1134	MEMBRANE(non-PSE)
45	AAO90647.1	AAWAGKYTL		CBU_1134	MEMBRANE(non-PSE)
53	AAO90647.1	LVTPHTPHL		CBU_1134	MEMBRANE(non-PSE)
60	AAO90648.1	AMHPKISRF		CBU_1135	SECRETED
302	AAO90655.1	YTFEKQLVL	secD	CBU_1142	PSE-Membrane
403	AAO90655.1	FQITNLSTM	secD	CBU_1142	PSE-Membrane
81	AAO90656.1	RLKDNFVVL	yajC	CBU_1143	MEMBRANE(non-PSE)
71	AAO90660.1	SADTPILHF	mfd	CBU_1148	CYTOPLASM(non-PSE)
532	AAO90660.1	KIYVPVSSL	mfd	CBU_1148	CYTOPLASM(non-PSE)
666	AAO90660.1	VAVLVPTTL	mfd	CBU_1148	CYTOPLASM(non-PSE)
769	AAO90660.1	TATPIPRTL	mfd	CBU_1148	CYTOPLASM(non-PSE)
241	AAO90664.1	KVSPSPYHF	trpE	CBU_1152	CYTOPLASM(non-PSE)
379	AAO90664.1	RAMEIIDEL	trpE	CBU_1152	CYTOPLASM(non-PSE)
204	AAO90665.1	YIPDHIISV	trpC	CBU_1154	CYTOPLASM(non-PSE)
227	AAO90666.1	TLMAPLQEL	trpBF	CBU_1155	CYTOPLASM(non-PSE)
248	AAO90667.1	SLNPHYPNL	trpA	CBU_1156	CYTOPLASM(non-PSE)
64	AAO90671.1	KIKESLVTL		CBU_1160	CYTOPLASM(non-PSE)
52	AAO90673.1	RVYPSVMEY		CBU_1162	MEMBRANE(non-PSE)
138	AAO90673.1	AAFAYVTTL		CBU_1162	MEMBRANE(non-PSE)
26	AAO90684.1	HTYDVETNL		CBU_1175	MEMBRANE(non-PSE)
222	AAO90684.1	KAPEVLTQL		CBU_1175	MEMBRANE(non-PSE)
1	AAO90694.1	MTIDNPSAF	uvrC	CBU_1185	CYTOPLASM(non-PSE)
474	AAO90694.1	QAAEVLEEL	uvrC	CBU_1185	CYTOPLASM(non-PSE)
59	AAO90696.1	AVKKPIMTL		CBU_1187	SECRETED
24	AAO90699.1	AQSDATTQL	lolA	CBU_1190	SECRETED
16	AAO90700.2	SAKETGVLL	ftsK	CBU_1191	PSE-Membrane
288	AAO90700.2	SAILPELSL	ftsK	CBU_1191	PSE-Membrane
482	AAO90700.2	SVYEGIPHLL	ftsK	CBU_1191	PSE-Membrane
158	AAO90703.1	RAFPFIDEF		CBU_1194	PSE-Membrane
241	AAO90703.1	LTFPLNPSL		CBU_1194	PSE-Membrane
177	AAO90717.1	FSYSTPLYF		CBU_1208	MEMBRANE(non-PSE)
5	AAO90726.1	HQNQPSSPF		CBU_1217	CYTOPLASM(non-PSE)
115	AAO90729.1	RLNPPLYEL	purC	CBU_1220	CYTOPLASM(non-PSE)
65	AAO90730.1	SLVPPGSNL		CBU_1221	PSE-Lipoprotein
214	AAO90731.2	VVPKPYHAF	dapA	CBU_1222	CYTOPLASM(non-PSE)
6	AAO90733.2	ILIPGIPTL		CBU_1224	PSE-Membrane
161	AAO90735.2	STLEAPISM		CBU_1226	CYTOPLASM(non-PSE)
922	AAO90735.2	AADKGTATF		CBU_1226	CYTOPLASM(non-PSE)
1016	AAO90735.2	AAFDHRHIF		CBU_1226	CYTOPLASM(non-PSE)
1485	AAO90735.2	GTAPLFHAL		CBU_1226	CYTOPLASM(non-PSE)
150	AAO90737.1	TLYDPATEL	qseC	CBU_1228	PSE-Membrane
257	AAO90737.1	FTADAAHEL	qseC	CBU_1228	PSE-Membrane
419	AAO90737.1	RVFERFFRM	qseC	CBU_1228	PSE-Membrane
468	AAO90737.1	VTFPLIHNF	qseC	CBU_1228	PSE-Membrane
795	AAO90738.1	SANEKFNSF		CBU_1229	CYTOPLASM(non-PSE)
9	AAO90739.1	QALDPQQSF		CBU_1230	CYTOPLASM(non-PSE)
313	AAO90739.1	RMKDLLSQL		CBU_1230	CYTOPLASM(non-PSE)
412	AAO90739.1	FQDTSIIQF		CBU_1230	CYTOPLASM(non-PSE)
569	AAO90739.1	QLIEITPAL		CBU_1230	CYTOPLASM(non-PSE)
807	AAO90739.1	KADPVYNYL		CBU_1230	CYTOPLASM(non-PSE)
23	AAO90751.1	FAFINPAEL		CBU_1242	CYTOPLASM(non-PSE)
56	AAO90751.1	VTIPTGLSF		CBU_1242	CYTOPLASM(non-PSE)
130	AAO90751.1	RVNDISPEF		CBU_1242	CYTOPLASM(non-PSE)
138	AAO90751.1	FAFSFSPKF		CBU_1242	CYTOPLASM(non-PSE)
382	AAO90751.1	NSFAGVTSL		CBU_1242	CYTOPLASM(non-PSE)
354	AAO90752.1	QTMSPLTTL	xseA	CBU_1243	CYTOPLASM(non-PSE)
117	AAO90753.1	AAIVVPMTL		CBU_1244	MEMBRANE(non-PSE)
378	AAO90753.1	LVFPNSPSL		CBU_1244	MEMBRANE(non-PSE)
431	AAO90753.1	YQSIAPTEL		CBU_1244	MEMBRANE(non-PSE)
161	AAO90763.1	EQIEIVHRL		CBU_1255	CYTOPLASM(non-PSE)
88	AAO90768.1	YAFNPYFSL		CBU_1260	SECRETED
159	AAO90768.1	YVHTKFVAF		CBU_1260	SECRETED
48	AAO90769.1	QQPETPPSL		CBU_1261	SECRETED
55	AAO90769.1	SLVPPPPNL		CBU_1261	SECRETED
401	AAO90769.1	RAWDHLALF		CBU_1261	SECRETED
38	AAO90775.1	TVIPGSITM		CBU_1267	PSE-Membrane
153	AAO90776.2	GAYPKTLPF		CBU_1268	CYTOPLASM(non-PSE)
91	AAO90780.1	RQYERLIEVF		CBU_1273	CYTOPLASM(non-PSE)
101	AAO90780.1	KAHDIGYVF		CBU_1273	CYTOPLASM(non-PSE)
53	AAO90781.1	SADSPHIVL		CBU_1274	SECRETED
61	AAO90782.1	SQIEDIWQYF	rspA	CBU_1275	CYTOPLASM(non-PSE)
349	AAO90782.1	EVFPHHYYF	rspA	CBU_1275	CYTOPLASM(non-PSE)
20	AAO90790.1	QLDPHLREL		CBU_1284	CYTOPLASM(non-PSE)
421	AAO90790.1	QTMPVFQFL		CBU_1284	CYTOPLASM(non-PSE)
303	AAO90791.1	ALLPTTLTF		CBU_1285	MEMBRANE(non-PSE)
427	AAO90792.1	RIFSKTNVL		CBU_1286	CYTOPLASM(non-PSE)
129	AAO90797.1	SVKPHPHLI		CBU_1291	CYTOPLASM(non-PSE)
187	AAO90797.1	SALHKSPTL		CBU_1291	CYTOPLASM(non-PSE)
46	AAO90800.1	SQHKIMHAF		CBU_1294	CYTOPLASM(non-PSE)
448	AAO90803.1	AQKENTSAL	recN	CBU_1297	CYTOPLASM(non-PSE)
28	AAO90813.2	YTYIPPKSF		CBU_1307	PSE-Lipoprotein
493	AAO90816.1	SADQRIIIF		CBU_1311	CYTOPLASM(non-PSE)
62	AAO90820.1	FQLEHAHFL		CBU_1316	CYTOPLASM(non-PSE)
32	AAO90832.1	QAIEVARQL		CBU_1328	CYTOPLASM(non-PSE)
266	AAO90838.1	FAYQQITSL		CBU_1335	CYTOPLASM(non-PSE)
25	AAO90841.2	SAKNIVNTL		CBU_1338	CYTOPLASM(non-PSE)
73	AAO90841.2	SARPITIAF		CBU_1338	CYTOPLASM(non-PSE)
343	AAO90848.1	FLAPIYPTL		CBU_1345	MEMBRANE(non-PSE)
186	AAO90852.2	NLSEIILTL		CBU_1349	CYTOPLASM(non-PSE)
193	AAO90852.2	TLMEGIIKL		CBU_1349	CYTOPLASM(non-PSE)
66	AAO90853.1	SAAGVNIKL	glmM	CBU_1350	CYTOPLASM(non-PSE)
163	AAO90853.1	STFPSNLTL	glmM	CBU_1350	CYTOPLASM(non-PSE)
188	AAO90853.1	VAPSIFHEL	glmM	CBU_1350	CYTOPLASM(non-PSE)
365	AAO90853.1	VMVKHPQVL	glmM	CBU_1350	CYTOPLASM(non-PSE)
216	AAO90854.1	YLLNKLPEF	folP	CBU_1351	CYTOPLASM(non-PSE)
106	AAO90861.1	IQRDIQNEL	sufD	CBU_1358	CYTOPLASM(non-PSE)
165	AAO90861.1	SQIRHVILL	sufD	CBU_1358	CYTOPLASM(non-PSE)
101	AAO90865.1	IAFDTLEHL	czcD.2	CBU_1362	MEMBRANE(non-PSE)
112	AAO90865.1	HAHLPLPTF	czcD.2	CBU_1362	MEMBRANE(non-PSE)
335	AAO90866.1	FTYPKVPNL		CBU_1363	CYTOPLASM(non-PSE)
426	AAO90866.1	TAFNQIESL		CBU_1363	CYTOPLASM(non-PSE)
308	AAO90876.1	ESFPNVHHL	pabB	CBU_1373	CYTOPLASM(non-PSE)
350	AAO90876.1	SAMQIIESL	pabB	CBU_1373	CYTOPLASM(non-PSE)
141	AAO90878.1	KLSERLTTL	relA	CBU_1375	CYTOPLASM(non-PSE)
194	AAO90878.1	YLNPNEYSL	relA	CBU_1375	CYTOPLASM(non-PSE)
281	AAO90878.1	TALSIVHAL	relA	CBU_1375	CYTOPLASM(non-PSE)
429	AAO90878.1	KMVPLTRTL	relA	CBU_1375	CYTOPLASM(non-PSE)
23	ACI15292.1	AIFQKVNQL		CBU_1379a	CYTOPLASM(non-PSE)
103	AAO90883.1	IAYQNVHYF		CBU_1380	MEMBRANE(non-PSE)
126	AAO90883.1	SAFEWHLTF		CBU_1380	MEMBRANE(non-PSE)
150	AAO90883.1	KLFAGPVSF		CBU_1380	MEMBRANE(non-PSE)
57	AAO90886.1	IAIENPRTL	rrf	CBU_1383	CYTOPLASM(non-PSE)
42	AAO90901.2	ISYPQWHAL	sdhD	CBU_1402	MEMBRANE(non-PSE)
112	AAO90908.1	SVYEQVTKF	gltA	CBU_1410	CYTOPLASM(non-PSE)
163	AAO90908.1	RLIAKMPTL	gltA	CBU_1410	CYTOPLASM(non-PSE)
217	AAO90908.1	RAMDRIFIL	gltA	CBU_1410	CYTOPLASM(non-PSE)
120	AAO90910.2	AQFNGSVSL		CBU_1412	PSE-Membrane
98	AAO90913.1	GAIPHTVLL	thiL	CBU_1415	CYTOPLASM(non-PSE)
50	AAO90914.2	IAQPIIHRL		CBU_1416	CYTOPLASM(non-PSE)
8	AAO90928.1	VADLIHQQL	rbfA	CBU_1431	CYTOPLASM(non-PSE)
200	AAO90932.1	SATPLHQNL	nuoN	CBU_1435	MEMBRANE(non-PSE)
294	AAO90948.1	ITYTNPTSL		CBU_1451	PSE-Membrane
279	AAO90955.1	QAFEHFIALEL		CBU_1458	CYTOPLASM(non-PSE)
153	AAO90964.1	RVKQVIVSL	tldD	CBU_1467	CYTOPLASM(non-PSE)
109	AAO90965.2	RLFPGHVWL		CBU_1468	PSE-Membrane
236	AAO90965.2	SQWESSYFL		CBU_1468	PSE-Membrane
367	AAO90965.2	YQPKRIQTLF		CBU_1468	PSE-Membrane
952	AAO90965.2	KQWKITHAL		CBU_1468	PSE-Membrane
9	AAO90967.1	SSMPGLRTL	mreC	CBU_1470	PSE-Membrane
270	AAO90967.1	MTWPNKASL	mreC	CBU_1470	PSE-Membrane
278	AAO90967.1	LAQDVHQEL	mreC	CBU_1470	PSE-Membrane
34	AAO90970.1	KTFDLVIKM	gatC	CBU_1473	CYTOPLASM(non-PSE)
167	AAO90973.1	VALPKHHPL	oxyR	CBU_1476	CYTOPLASM(non-PSE)
8	AAO90977.1	SLIELLVSL		CBU_1480	PSE-Membrane
59	AAO90986.1	KIIESLQTL	lpxH	CBU_1489	CYTOPLASM(non-PSE)
104	AAO90986.1	QLYNKPVLL	lpxH	CBU_1489	CYTOPLASM(non-PSE)
182	AAO90986.1	VMKEQNVEL	lpxH	CBU_1489	CYTOPLASM(non-PSE)
228	AAO90986.1	YAQDGSFEL	lpxH	CBU_1489	CYTOPLASM(non-PSE)
256	AAO90990.2	KPYEPILNL		CBU_1493	CYTOPLASM(non-PSE)
370	AAO90990.2	MASPHVASL		CBU_1493	CYTOPLASM(non-PSE)
495	AAO90990.2	HPNPSPTIF		CBU_1493	CYTOPLASM(non-PSE)
213	AAO90991.2	AAIPVINEL	pdxJ	CBU_1494	CYTOPLASM(non-PSE)
278	AAO91005.1	YVARFHQYL		CBU_1508	CYTOPLASM(non-PSE)
281	AAO91006.1	FQLPQTKQL	tilS	CBU_1509	CYTOPLASM(non-PSE)
201	AAO91008.1	QAADIITGL		CBU_1511	MEMBRANE(non-PSE)
112	AAO91014.1	TQFPDSQQI		CBU_1517	CYTOPLASM(non-PSE)
10	AAO91027.1	KQYSQQLQL		CBU_1530	PSE-Membrane
537	AAO91027.1	SAINIAHRL		CBU_1530	PSE-Membrane
6	AAO91033.1	NQNPKPMVL	yibO	CBU_1536	CYTOPLASM(non-PSE)
310	AAO91033.1	AVAFPPLEL	yibO	CBU_1536	CYTOPLASM(non-PSE)
371	AAO91033.1	ATYDLQPEM	yibO	CBU_1536	CYTOPLASM(non-PSE)
185	AAO91034.2	AIHDLQSTL		CBU_1537	PSE-Membrane
248	AAO91036.1	SLMPLILYL		CBU_1539	MEMBRANE(non-PSE)
283	AAO91036.1	AVSELSNTL		CBU_1539	MEMBRANE(non-PSE)
80	AAO91045.1	MAMPHIMAV		CBU_1548	MEMBRANE(non-PSE)
236	AAO91047.2	AARDEIQTL	ptsP	CBU_1550	PSE-Membrane
462	AAO91047.2	LAIEGGLSL	ptsP	CBU_1550	PSE-Membrane
203	AAO91048.1	YPVDHVVEF		CBU_1551	CYTOPLASM(non-PSE)
209	AAO91051.1	WALPYTQSL	nrdB	CBU_1554	PSE-Membrane
107	AAO91053.1	SPHPRVNQF		CBU_1556	MEMBRANE(non-PSE)
109	AAO91063.1	TVAEVRHAF		CBU_1566	CYTOPLASM(non-PSE)
68	AAO91064.1	AAIEQVFTF	ruvC	CBU_1567	CYTOPLASM(non-PSE)
280	AAO91070.1	ITTPLSHAL		CBU_1573	MEMBRANE(non-PSE)
83	AAO91076.1	MAAPLKYFL		CBU_1579	CYTOPLASM(non-PSE)
187	AAO91076.1	RLAEISLKL		CBU_1579	CYTOPLASM(non-PSE)
75	AAO91079.1	MTAPIASHL	shaG	CBU_1582	MEMBRANE(non-PSE)
214	AAO91082.1	IAFSIKTAL	shaD	CBU_1585	MEMBRANE(non-PSE)
67	AAO91083.1	VANPLPQAL		CBU_1586	MEMBRANE(non-PSE)
94	AAO91092.2	MAFDRMEFL	dnaG	CBU_1595	CYTOPLASM(non-PSE)
334	AAO91093.1	ALAELFSTF	rpoD	CBU_1596	SECRETED
538	AAO91093.1	HMIETINKL	rpoD	CBU_1596	SECRETED
169	AAO91100.1	RAFGAPVIL		CBU_1603	CYTOPLASM(non-PSE)
50	AAO91120.1	SVAELATVL	icmD	CBU_1624	MEMBRANE(non-PSE)
16	AAO91121.1	YMAEIVQSV	icmC	CBU_1625	MEMBRANE(non-PSE)
179	AAO91122.1	TAPPVVFHL	icmG	CBU_1626	PSE-Membrane
59	AAO91125.1	TADGRIIML	icmL.1	CBU_1629	PSE-Membrane
153	AAO91127.2	RQAQVVASF	icmN	CBU_1631	PSE-Membrane
104	AAO91128.1	RQAQGIYYF	icmO	CBU_1632	PSE-Membrane
175	AAO91128.1	KVFSIVRSM	icmO	CBU_1632	PSE-Membrane
735	AAO91128.1	QAMNIAVEL	icmO	CBU_1632	PSE-Membrane
86	AAO91130.1	KLYEEALAL	icmQ	CBU_1634	CYTOPLASM(non-PSE)
202	AAO91134.1	FVFEEPHTF		CBU_1638	CYTOPLASM(non-PSE)
302	AAO91134.1	KIFLHNTTL		CBU_1638	CYTOPLASM(non-PSE)
10	AAO91140.1	IAIATFTTL	dotC	CBU_1644	PSE-Lipoprotein
93	AAO91140.1	HLFDFNQLL	dotC	CBU_1644	PSE-Lipoprotein
46	AAO91141.1	EVYGRLQTL	dotB	CBU_1645	CYTOPLASM(non-PSE)
282	AAO91141.1	RTIDIIETL	dotB	CBU_1645	CYTOPLASM(non-PSE)
169	AAO91142.1	NALPRTATL		CBU_1646	MEMBRANE(non-PSE)
178	AAO91142.1	FAFSGTFAL		CBU_1646	MEMBRANE(non-PSE)
265	AAO91142.1	STFEKRPSM		CBU_1646	MEMBRANE(non-PSE)
272	AAO91142.1	SMPGVVHAF		CBU_1646	MEMBRANE(non-PSE)
293	AAO91144.2	MAKEAVSEL	dotaA	CBU_1648	PSE-Membrane
297	AAO91144.2	AVSELVTSL	dotaA	CBU_1648	PSE-Membrane
420	AAO91144.2	YQAALKQSL	dotaA	CBU_1648	PSE-Membrane
437	AAO91144.2	TANPHPIPV	dotaA	CBU_1648	PSE-Membrane
249	AAO91148.1	LAIDNFNTL	icmX	CBU_1652	SECRETED
107	AAO91154.1	KLFLHFHQF		CBU_1658	CYTOPLASM(non-PSE)
66	AAO91155.2	SSHPVAIVL		CBU_1659	MEMBRANE(non-PSE)
97	AAO91155.2	HQFSKTSNL		CBU_1659	MEMBRANE(non-PSE)
182	AAO91155.2	SLTPVAPTF		CBU_1659	MEMBRANE(non-PSE)
52	AAO91156.1	KAFNTIESL		CBU_1660	CYTOPLASM(non-PSE)
242	AAO91156.1	TILKHLHSL		CBU_1660	CYTOPLASM(non-PSE)
226	AAO91157.1	VAADRIESL	rfaF	CBU_1661	CYTOPLASM(non-PSE)
77	AAO91165.1	SSDPTQIYL	rpoS	CBU_1669	SECRETED
328	AAO91165.1	IQIDALQQL	rpoS	CBU_1669	SECRETED
142	AAO91167.2	TAAKVVYQL	surE	CBU_1671	CYTOPLASM(non-PSE)
114	AAO91173.1	RLFPKVAEM		CBU_1677	CYTOPLASM(non-PSE)
82	AAO91181.1	SQLTLLHSF		CBU_1685	CYTOPLASM(non-PSE)
285	AAO91181.1	YIKENILNL		CBU_1685	CYTOPLASM(non-PSE)
333	AAO91181.1	NFYEKITEL		CBU_1685	CYTOPLASM(non-PSE)
47	AAO91182.1	AQADRIYEM		CBU_1686	CYTOPLASM(non-PSE)
51	AAO91182.1	RIYEMLQQL		CBU_1686	CYTOPLASM(non-PSE)
202	AAO91182.1	KQIPLITRY		CBU_1686	CYTOPLASM(non-PSE)
225	AAO91182.1	SILDVFLQL		CBU_1686	CYTOPLASM(non-PSE)
266	AAO91182.1	RLIDNRFSF		CBU_1686	CYTOPLASM(non-PSE)
513	AAO91182.1	SQQEKTIQL		CBU_1686	CYTOPLASM(non-PSE)
619	AAO91182.1	SVNEHANQF		CBU_1686	CYTOPLASM(non-PSE)
149	AAO91183.1	YANEGVAQM		CBU_1688	CYTOPLASM(non-PSE)
240	AAO91194.1	AVSPLYFTL		CBU_1699	SECRETED
1	AAO91198.1	MAYMKKITL	pyrC	CBU_1703	CYTOPLASM(non-PSE)
117	AAO91204.1	YAKEAAHYF	dapB	CBU_1709	CYTOPLASM(non-PSE)
125	AAO91209.1	SLYDGASAL		CBU_1714	CYTOPLASM(non-PSE)
235	AAO91209.1	SVNPTAMAL		CBU_1714	CYTOPLASM(non-PSE)
377	AAO91209.1	FSSPIFHEF		CBU_1714	CYTOPLASM(non-PSE)
206	AAO91218.2	TQQDRVTQL	dsbD	CBU_1723	PSE-Membrane
434	AAO91218.2	RILPGTVTM	dsbD	CBU_1723	PSE-Membrane
591	AAO91218.2	VVAPPTVLF	dsbD	CBU_1723	PSE-Membrane
238	AAO91219.1	FADIHGQTL		CBU_1724	CYTOPLASM(non-PSE)
272	AAO91219.1	FQEEKSEEF		CBU_1724	CYTOPLASM(non-PSE)
715	AAO91219.1	SLASKLTTF		CBU_1724	CYTOPLASM(non-PSE)
39	AAO91220.1	TIAPTVPSF	accB	CBU_1725	CYTOPLASM(non-PSE)
47	AAO91220.1	FAPPSETTF	accB	CBU_1725	CYTOPLASM(non-PSE)
44	AAO91229.2	VSDQSPQTL		CBU_1735	PSE-Membrane
156	AAO91229.2	SQNPALHAL		CBU_1735	PSE-Membrane
89	AAO91232.1	RVNDNRHQF	hipB	CBU_1738	CYTOPLASM(non-PSE)
39	AAO91235.1	RAFENPSTV		CBU_1741	PSE-Lipoprotein
81	AAO91235.1	KQRGPVPTL		CBU_1741	PSE-Lipoprotein
89	AAO91240.2	YAFENGRGMVF	sspB	CBU_1746	CYTOPLASM(non-PSE)
163	AAO91245.1	EADPHLRVL		CBU_1751	CYTOPLASM(non-PSE)
210	AAO91246.1	MAHKKLTTL		CBU_1752	CYTOPLASM(non-PSE)
141	AAO91248.1	RIIDGHPLM		CBU_1754	CYTOPLASM(non-PSE)
363	AAO91250.1	HADQLPLAL		CBU_1756	MEMBRANE(non-PSE)
326	AAO91257.2	RSIDDFHAL		CBU_1763	CYTOPLASM(non-PSE)
378	AAO91257.2	FVYSPEHFL		CBU_1763	CYTOPLASM(non-PSE)
509	AAO91260.1	KPAPLVMEL	feoB	CBU_1766	PSE-Membrane
66	AAO91261.2	RVRDFYLSL	feoA	CBU_1767	CYTOPLASM(non-PSE)
325	AAO91265.1	KLIEPNYQF		CBU_1771	MEMBRANE(non-PSE)
419	AAO91265.1	AAFPANLLF		CBU_1771	MEMBRANE(non-PSE)
297	AAO91272.1	SQFDPRKYL	fbaA	CBU_1778	CYTOPLASM(non-PSE)
463	AAO91274.2	SASSYFPQL		CBU_1780	CYTOPLASM(non-PSE)
236	AAO91284.1	YTYMKVQTF		CBU_1790	CYTOPLASM(non-PSE)
312	AAO91284.1	SPSPHTYLL		CBU_1790	CYTOPLASM(non-PSE)
37	AAO91287.2	SATPSSITL		CBU_1794	CYTOPLASM(non-PSE)
161	AAO91289.1	IAIPVIVAL		CBU_1796	MEMBRANE(non-PSE)
173	AAO91289.1	AVYFSPHQL		CBU_1796	MEMBRANE(non-PSE)
52	AAO91291.1	YALGQHTHL		CBU_1798	MEMBRANE(non-PSE)
77	AAO91291.1	LAYNQVIKL		CBU_1798	MEMBRANE(non-PSE)
299	AAO91291.1	QTWPYHHFL		CBU_1798	MEMBRANE(non-PSE)
172	AAO91301.1	IANPIGHQI		CBU_1808	PSE-Membrane
41	AAO91303.1	KLQPSVTQL	macA	CBU_1810	PSE-Lipoprotein
254	AAO91304.1	SMMQQQSSL		CBU_1811	CYTOPLASM(non-PSE)
432	AAO91304.1	KVAEHGVEL		CBU_1811	CYTOPLASM(non-PSE)
125	AAO91308.1	QAAPPSLEL	priA	CBU_1815	CYTOPLASM(non-PSE)
145	AAO91308.1	MASKGFQTF	priA	CBU_1815	CYTOPLASM(non-PSE)
634	AAO91308.1	SVLNKLISL	priA	CBU_1815	CYTOPLASM(non-PSE)
293	AAO91311.1	SQLPIQKEL		CBU_1818	MEMBRANE(non-PSE)
165	AAO91312.1	YVSKKMVHL		CBU_1819	MEMBRANE(non-PSE)
273	AAO91312.1	KIFKRIQSL		CBU_1819	MEMBRANE(non-PSE)
53	AAO91313.1	ALFQPAQKL		CBU_1820	CYTOPLASM(non-PSE)
85	AAO91314.1	VANPPGVRL		CBU_1821	CYTOPLASM(non-PSE)
148	AAO91320.2	FQEDPVRVL		CBU_1827	CYTOPLASM(non-PSE)
169	AAO91320.2	SIHPDTLEL		CBU_1827	CYTOPLASM(non-PSE)
121	AAO91322.1	YTASTPEQL	lolB	CBU_1829	PSE-Lipoprotein
3	AAO91328.1	RTNPHIAIL		CBU_1835	CYTOPLASM(non-PSE)
57	AAO91329.1	IAYGKETKL		CBU_1836	PSE-Membrane
285	AAO91329.1	YVFYRPYHL		CBU_1836	PSE-Membrane
213	AAO91332.1	YADRVAHEF		CBU_1839	CYTOPLASM(non-PSE)
400	AAO91332.1	YVIQRYVSL		CBU_1839	CYTOPLASM(non-PSE)
60	AAO91333.1	STFSSILTL		CBU_1840	CYTOPLASM(non-PSE)
341	AAO91342.2	YSFSMIPAL		CBU_1851	PSE-Membrane
397	AAO91342.2	YLYHIQPHL		CBU_1851	PSE-Membrane
296	AAO91343.1	FLFQHPKAL		CBU_1852	MEMBRANE(non-PSE)
102	AAO91349.1	YSAPFATHL	oppC	CBU_1858	MEMBRANE(non-PSE)
12	AAO91353.1	RAISNPIEL		CBU_1862	CYTOPLASM(non-PSE)
270	AAO91354.1	RPFPELEQF		CBU_1863	MEMBRANE(non-PSE)
377	AAO91357.1	FVIERLHLL	parC	CBU_1866	CYTOPLASM(non-PSE)
17	AAO91360.1	SAFAQTQTI		CBU_1869	SECRETED
203	AAO91361.1	FQAKVMTTL		CBU_1870	CYTOPLASM(non-PSE)
345	AAO91365.1	AVAEPVVYL		CBU_1874	CYTOPLASM(non-PSE)
540	AAO91378.1	YAIEYLTRF	ponA	CBU_1887	PSE-Membrane
553	AAO91378.1	NVLPHSLSL	ponA	CBU_1887	PSE-Membrane
66	AAO91379.1	KVFSKTIPF		CBU_1888	CYTOPLASM(non-PSE)
112	AAO91379.1	AQKPPTCHLF		CBU_1888	CYTOPLASM(non-PSE)
385	AAO91387.2	YAFEALLAF		CBU_1896	MEMBRANE(non-PSE)
105	AAO91393.1	TADDFTVYF		CBU_1902	SECRETED
117	AAO91393.1	SADQLPVAF		CBU_1902	SECRETED
287	AAO91393.1	YALDVLSTL		CBU_1902	SECRETED
287	AAO91394.1	FAIAKKMQL	ftsY	CBU_1903	CYTOPLASM(non-PSE)
83	AAO91395.1	MIFQNPQLL	ftsE	CBU_1904	CYTOPLASM(non-PSE)
129	AAO91396.2	SSNPLPPVL	ftsX	CBU_1905	PSE-Membrane
20	AAO91401.1	IAAPSQFSF	com1	CBU_1910	SECRETED
141	AAO91401.1	SQYAAKVSL	com1	CBU_1910	SECRETED
567	AAO91405.2	KAVQHFQTL	glyS	CBU_1914	CYTOPLASM(non-PSE)
258	AAO91406.1	EVNPHLKTL	sun	CBU_1915	CYTOPLASM(non-PSE)
71	AAO91407.1	RMNEIASQL		CBU_1916	CYTOPLASM(non-PSE)
400	AAO91411.1	EMQPRIQAL	yidC	CBU_1920	MEMBRANE(non-PSE)
532	AAO91411.1	ITNNVVQTL	yidC	CBU_1920	MEMBRANE(non-PSE)
11	AAO91419.2	QVISLTHQF		CBU_1928	PSE-Membrane
298	AAO91419.2	SAYGKTLNM		CBU_1928	PSE-Membrane
505	AAO91419.2	IQFKGPSAM		CBU_1928	PSE-Membrane
668	AAO91419.2	SAFWQTIKL		CBU_1928	PSE-Membrane
302	AAO91420.2	MTFGQVIQF		CBU_1929	MEMBRANE(non-PSE)
59	AAO91425.2	WAVPKGPSL		CBU_1934	CYTOPLASM(non-PSE)
405	AAO91425.2	YTKPRGEQL		CBU_1934	CYTOPLASM(non-PSE)
771	AAO91425.2	SAVKSPTQF		CBU_1934	CYTOPLASM(non-PSE)
126	AAO91429.1	FQMGGVEHF	atpB	CBU_1939	MEMBRANE(non-PSE)
113	AAO91449.2	YAIQKAVEL		CBU_1960	CYTOPLASM(non-PSE)
228	AAO91455.1	RLSDIPTYL	hemA	CBU_1966	CYTOPLASM(non-PSE)
384	AAO91455.1	ILHQPTTKL	hemA	CBU_1966	CYTOPLASM(non-PSE)
395	AAO91455.1	AAYEDQVQL	hemA	CBU_1966	CYTOPLASM(non-PSE)
54	AAO91456.1	HTFPGVIQL		CBU_1967	MEMBRANE(non-PSE)
105	AAO91456.1	AVFARHLSL		CBU_1967	MEMBRANE(non-PSE)
261	AAO91456.1	AQYSTIITL		CBU_1967	MEMBRANE(non-PSE)
312	AAO91456.1	AAFNGLSAF		CBU_1967	MEMBRANE(non-PSE)
164	AAO91467.1	VADKGTLTL	ostA	CBU_1978	SECRETED
171	AAO91467.1	TLYPKTAIL	ostA	CBU_1978	SECRETED
616	AAO91467.1	FSFEQLFAL	ostA	CBU_1978	SECRETED
833	AAO91467.1	TAYGFELQL	ostA	CBU_1978	SECRETED
50	AAO91469.2	TQSELNHAL		CBU_1980	SECRETED
240	AAO91469.2	SAKELPQVF		CBU_1980	SECRETED
51	AAO91472.1	FSIPINVNL	uspA	CBU_1983	CYTOPLASM(non-PSE)
125	AAO91474.1	YTIKPIVSM		CBU_1985	PSE-Membrane
77	AAO91475.1	SALRVVPEL	sppA	CBU_1986	PSE-Membrane
158	AAO91476.1	TALKGPHYL	apaH	CBU_1987	CYTOPLASM(non-PSE)
252	AAO91476.1	SSAPHTHAL	apaH	CBU_1987	CYTOPLASM(non-PSE)
119	AAO91482.1	HSFEGDVYF	folA	CBU_1993	CYTOPLASM(non-PSE)
305	AAO91486.1	KLIPGKTVF	fmt	CBU_1997	CYTOPLASM(non-PSE)
23	AAO91487.1	TTAPNHHIL		CBU_1998	CYTOPLASM(non-PSE)
99	AAO91488.2	ILNPHTREL	smg	CBU_1999	CYTOPLASM(non-PSE)
283	AAO91489.1	KTMQIAQQL	topA	CBU_2000	CYTOPLASM(non-PSE)
204	AAO91493.1	KQWDFNVVL		CBU_2004	CYTOPLASM(non-PSE)
72	AAO91496.1	FQNPEFNEF		CBU_2007	CYTOPLASM(non-PSE)
351	AAO91497.1	FAADVAYHL	argS	CBU_2008	CYTOPLASM(non-PSE)
74	AAO91504.2	RIYDSVHFF		CBU_2016	CYTOPLASM(non-PSE)
38	AAO91509.2	YQFPQAPNM		CBU_2021	CYTOPLASM(non-PSE)
92	AAO91516.1	YQPDIQTVF		CBU_2029	SECRETED
50	AAO91540.1	VAAELIPVL		CBU_2055	MEMBRANE(non-PSE)
320	AAO91543.1	SAYPLFLLF		CBU_2058	MEMBRANE(non-PSE)
138	AAO91550.1	YANLAHIKL		CBU_2065	PSE-Lipoprotein
321	AAO91552.1	LMYEPNLSF		CBU_2068	MEMBRANE(non-PSE)
113	AAO91555.1	ATYGHIHQM		CBU_2071	MEMBRANE(non-PSE)
91	AAO91556.1	YQSDEKMTF		CBU_2072	SECRETED
193	AAO91557.1	RQHSPYLHL		CBU_2073	PSE-Membrane
151	AAO91559.1	EQYEDVKTL	aroD	CBU_2075	CYTOPLASM(non-PSE)
284	AAO91564.2	NIIKKIQAL		CBU_2080	PSE-Membrane
370	AAO91576.1	SVKGVTSTF	pckA	CBU_2092	CYTOPLASM(non-PSE)
